1     **Standard selection treatments with sulfadiazine limit *Plasmodium yoelii* host-to-vector transmission**

2

3     Kelly T. Rios<sup>1</sup>, Taylor M. Dickson<sup>1</sup>, and Scott E. Lindner<sup>1, #</sup>

4     1. Department of Biochemistry and Molecular Biology, The Huck Center for Malaria Research,

5         Pennsylvania State University, University Park, PA 16802

6     #. Corresponding Author. Scott E. Lindner ([Scott.Lindner@psu.edu](mailto:Scott.Lindner@psu.edu), ORCID: [0000-0003-1799-3726](https://orcid.org/0000-0003-1799-3726))

7     Keywords: Plasmodium, Gametocyte, Sulfadiazine, Malaria

8

## 9 Abstract

10 Some early antimalarial drugs have been repurposed for experimental applications, thus extending their  
11 utility well beyond the point when resistance becomes prevalent in circulating parasite populations. One  
12 such drug is sulfadiazine, which is an analog of p-aminobenzoic acid (pABA), and acts as a competitive  
13 inhibitor of dihydropteroate synthase, which is an essential enzyme in the parasite's folate synthesis  
14 pathway that is required for DNA synthesis. Sulfadiazine treatment of mice infected with *P. yoelii* and *P.*  
15 *berghei* is routinely used to enrich for gametocytes by killing asexual blood stage parasites, but it is not  
16 well known if the exposed gametocytes are perturbed or if there is a detrimental effect on transmission.  
17 To determine if there was a significant effect of sulfadiazine exposure upon host-to-vector transmission,  
18 we transmitted *Plasmodium yoelii* (17XNL strain) parasites to *Anopheles stephensi* mosquitoes and  
19 evaluated the prevalence of infection (percent of mosquitoes infected) and intensity of infection  
20 (number of oocysts per infected mosquito) under different sulfadiazine treatment conditions of the  
21 mouse or of the mosquitoes. We observed that parasites exposed to sulfadiazine either in the mouse  
22 host or in the mosquito vector had a reduction in both the number of mosquitoes that became infected  
23 and in the intensity of infection compared to untreated controls. We also observed that provision of  
24 freshly prepared pABA in the mosquito sugar water could only marginally overcome the defects caused  
25 by sulfadiazine treatment. In contrast, we determined that gametocytes exposed to sulfadiazine were  
26 able to be fertilized and develop into morphologically mature ookinetes *in vitro*, and thus that  
27 sulfadiazine exposure in the host may be reversible if the drug is washed out and the parasites are  
28 supplemented with pABA in the culture media. Overall, this indicates that sulfadiazine dampens host-to-  
29 vector transmission, and that this inhibition can only be partially overcome by exposure to fresh pABA *in*  
30 *vivo* and *in vitro*. Because gametocytes are of great interest for developing transmission blocking  
31 interventions, we recommend that less disruptive approaches for gametocyte enrichment be used in  
32 order to study minimally perturbed parasites.

### 33 **Introduction**

34 Sulfa drugs have been used to treat human-infectious *Plasmodium falciparum*; sulfadoxine, in  
35 combination with another antifolate pyrimethamine, had been used extensively as an antimalarial  
36 therapy in endemic areas [1]. The widespread emergence of resistant parasites after drug pressure in  
37 clinical samples and in *in vitro* cultures makes these antifolates inappropriate for antimalarial  
38 monotherapies [2–4]. Because of this, sulfadoxine-pyrimethamine is now provided with artesunate as a  
39 WHO-recommended first-line combination therapy for the treatment of *P. falciparum* malaria in the  
40 WHO SE Asia regions [5].

41

42 Though sulfa drugs may not be as effective for treating human malaria infections today, sulfadiazine has  
43 been adapted as a commonly used tool to study rodent-infectious malaria parasites as it selectively kills  
44 the actively replicating asexual blood stages of the parasite and effectively enriches for sexual stage  
45 gametocytes [6]. Sulfa drugs act as antifolates by competitively inhibiting the interaction of an essential  
46 enzyme in the *de novo* folate synthesis pathway, dihydropteroate synthase (DHPS), with its substrate p-  
47 aminobenzoic acid (pABA). Antifolate drugs are effective against *Plasmodium* as they cannot use  
48 preformed folates like their hosts can and thus require *de novo* folate synthesis for the downstream  
49 generation of nucleic acids for DNA replication [7-8]. As such, actively replicating parasites, like those in  
50 asexual blood stages, are killed by sulfadiazine exposure, while non-replicating gametocytes survive and  
51 may be enriched by this treatment. *Plasmodium* parasites mainly source pABA from their hosts, though  
52 *de novo* pABA synthesis in *P. berghei* was recently observed when pABA in the rodent host diet was  
53 restricted [9]. In agreement with this, earlier work reported that pABA-deficient diets in rodent hosts is  
54 responsible for poor parasite growth and infection, indicating that pABA is an essential host-derived  
55 nutrient [10-11]. Indeed, newborn mice on naturally pABA-deficient milk diets suppressed parasitemia  
56 with Py17XNL infection and removal of pABA from the rodent diet reduced parasite load [12].

57 Therefore, it is notable that pABA is present in normal laboratory mouse feed at levels that allow for  
58 asexual blood stages to progress without additional supplementation (~175 µg/kg in conventional  
59 mouse feed) [9]. Similarly, laboratory-reared mosquitoes are commonly supplemented with pABA  
60 (0.05% w/v) in their sugar water to enhance oocyst numbers in transmission experiments [13].

61  
62 Commonly, treatment with sulfadiazine to enrich for *P. berghei* or *P. yoelii* sexual blood stage parasites  
63 is accomplished by providing 10-30 mg/L (30-120 µM) sulfadiazine in the rodent host's drinking water  
64 for 24-48 hours prior to parasite collection [14]. Despite this, little is documented regarding the possible  
65 downstream effects of sulfadiazine treatment on gametocytes, their host-to-vector transmission, and  
66 the early events of mosquito stage development. It is feasible that these parasite stages could be  
67 impacted by sulfadiazine, as they are known to undergo DNA replication in early mosquito development  
68 during gametogenesis, zygote-to-ookinete maturation, and in later development during sporogony [15].  
69 *Plasmodium* transmission studies starting from the 1940s have indicated that there may be an effect of  
70 sulfadiazine exposure on host-to-vector transmission, though this early work used a variety of mosquito  
71 vectors and *Plasmodium* species combinations and was limited in the number of mosquitoes tested and  
72 their analyses of transmission [13, 16–20]. Perhaps because of this, these studies showed some  
73 inconsistencies. For example, work on *P. gallinaceum* transmission to *Aedes aegypti* showed that  
74 sulfadiazine inhibited sporozoite development [16-17] but follow up work a few years later suggested  
75 that sulfadiazine or sulfanilamide in the *Aedes aegypti* diet can even increase the insect's susceptibility  
76 to *P. gallinaceum* oocyst development [18]. Work around the same time implied that *P. gallinaceum*  
77 oocyst growth in *Anopheles quadrimaculatus* is inhibited by sulfadiazine [19], but *P. vivax* transmission  
78 to *Anopheles stephensi* was not found to be inhibited by sulfadiazine [20]. Finally, work on *P. berghei*  
79 NK65 strain parasites in *Anopheles stephensi* showed that sulfadoxine exposure reduced the number of  
80 oocysts in a dose-dependent manner [13]. Together these early experiments all pointed in the same

81 direction: that sulfadiazine exposure is detrimental for proper transmission of *Plasmodium* parasites in  
82 mosquitoes. However, the limitations of these experiments leave many important details unanswered.

83

84 Here we have investigated the effects of sulfadiazine treatment of mice and mosquitoes upon the  
85 transmission of *P. yoelii* gametocytes to *An. stephensi* mosquitoes. Specifically, we considered if the  
86 timing of exposure to sulfadiazine affects transmission, if pABA can help overcome treatment with  
87 sulfadiazine, and if treated parasites will mature *in vitro* as expected. We found that sulfadiazine  
88 exposure in the host or mosquito vector resulted in significantly decreased prevalence and intensity of  
89 infection in the mosquito midgut. Furthermore, we observed that providing excess pABA to mosquitoes  
90 in their sugar water only marginally rescued the effects of sulfadiazine exposure in the host. Finally,  
91 when sulfadiazine-treated parasites were cultured *in vitro* to produce ookinetes, no difference in the  
92 proportion of mature ookinetes was observed when sulfadiazine was washed out, indicating that the  
93 effects of sulfadiazine exposure may be reversible.

94

## 95 **Results**

### 96 *Sulfadiazine treatment of the host limits transmission to mosquitoes*

97 To first test if the standard treatment of infected mice with sulfadiazine for the selection of gametocytes  
98 had any effect on parasite transmission, mice were provided with standard drinking water or  
99 sulfadiazine-treated drinking water for two days leading up to the infectious blood meal to mosquitoes  
100 (schematic in Figure 1A). Following transmission to *An. stephensi* mosquitoes, we assessed the  
101 prevalence and intensity of infection under each condition seven days later. Parasites treated in the host  
102 with sulfadiazine were severely impacted in their ability to transmit to mosquitoes; in three of four  
103 biological replicates no transmission was observed when mosquitoes fed on sulfadiazine-treated mice  
104 (Figure 1B). In the fourth biological replicate (grey data points), mosquitoes that fed on sulfadiazine-

105 treated mice were able to be infected, though at a significantly reduced intensity of infection, with  
106 significantly fewer oocysts per midgut observed (Figure 1C, Mann-Whitney unpaired t-test, p-value <  
107 0.0001). There was no observed difference in the size or morphology of oocysts that did form in  
108 mosquitoes that fed on sulfadiazine treated mice (representative oocyst micrographs provided in  
109 Supplemental Figure 1).

110

111 *pABA supplementation of mosquitoes does not overcome exposure of parasites to sulfadiazine in the*  
112 *host*

113 Because the fourth biological replicate (grey data points, Figure 1B-C) did result in limited transmission  
114 to mosquitoes, we considered whether there may have been different experimental conditions that  
115 allowed transmission of sulfadiazine-exposed parasites in this replicate. One such condition that may  
116 affect sulfadiazine treatment is the amount of pABA present in the mosquito vector, as sulfadiazine is a  
117 structural analog of pABA that acts as a competitive inhibitor of DHPS, and pABA supplementation of  
118 mosquitoes allows for increased numbers of oocysts to develop [13]. To determine if provision of fresh  
119 pABA to the mosquitoes could enable such transmission to occur, we replaced the pABA-supplemented  
120 sugar water daily using freshly dissolved pABA both before and after infectious blood meals taken from  
121 either control or sulfadiazine-treated mice. Consistent with this, we observed that fresh pABA  
122 supplementation enabled parasites to partially overcome exposure to sulfadiazine in the host and to  
123 successfully transmit to mosquitoes, albeit still at significantly lower levels than the untreated control  
124 (Figure 2B, Mann-Whitney unpaired t-test, p-value = 0.01). Moreover, the transmission intensity  
125 (oocysts per infected mosquito) was still significantly lower for mosquitoes that fed on treated mice  
126 than untreated mice (Figure 2C, Mann-Whitney t-test, p-value < 0.0001). Additionally, fresh pABA  
127 supplementation also improved the percentage of mosquitoes infected that fed on control mice as  
128 compared with routine pABA supplementation (compare Figure 1B and Figure 2B, average percent

129 infected: 75.68 vs. 80.45). This indicates that the standard practice of sulfadiazine treatment of parasites  
130 in the rodent host to select for gametocytes is detrimental to parasite transmission, and that this  
131 practice may introduce unwanted artifacts that could complicate the study of these important  
132 transmission stage parasites.

133

#### 134 *Pre-treatment of mosquitoes with sulfadiazine reduces the intensity of mosquito infection*

135 As sulfadiazine is bioavailable in the blood of the host [9], it will also be taken up along with the  
136 parasites during a blood meal. This would effectively extend the sulfadiazine exposure to the earliest  
137 mosquito stages as well. To test if parasites exposed only to sulfadiazine in the mosquito would have  
138 similar effects on transmission, we provided the mosquitoes with sulfadiazine in their sugar/pABA water  
139 for two days ahead of an infectious blood meal taken from untreated, infected mice (Figure 3A). We did  
140 not observe a statistically significant effect upon the prevalence of parasite transmission due to  
141 sulfadiazine exposure that was restricted to the mosquito midgut (Figure 3B, Mann-Whitney unpaired t-  
142 test, p-value = 0.400, not significant). Despite this, there was a significant reduction in the number of  
143 oocysts per infected mosquito observed when mosquitoes were treated with sulfadiazine (Figure 3C),  
144 indicating that sulfadiazine can affect the early mosquito stages (gametes, zygotes, ookinetes), as well as  
145 the sexual blood stage gametocytes.

146

#### 147 *Sulfadiazine exposure in the host does not affect morphological development of in vitro ookinetes*

148 Because sulfadiazine treatment of the rodent host limited parasite development *in vivo* (Figures 1 and  
149 2), and early mosquito stages were affected by sulfadiazine exposure in the mosquito midgut (Figure 3),  
150 we tested if sulfadiazine treatment had a reversible effect upon parasite development through these  
151 stages. To this end, mixed blood stage parasites from untreated or sulfadiazine-treated mice were  
152 collected using an Accudenz gradient, then resuspended and cultured *in vitro* in a defined medium

153 containing pABA (1.0 mg/L; 7.299  $\mu$ M) to assess fertilization and ookinete maturation (Figure 4A). Using  
154 differential interference contrast (DIC) microscopy, we did not observe any gross morphological  
155 differences in retorts or ookinetes that formed from either sulfadiazine-treated or untreated parasites  
156 (Figure 4B). Quantification of retort and ookinete stage parasites revealed no statistically significant  
157 differences in the proportions of retorts and ookinetes present in culture (Figure 4C, two-proportion Z-  
158 score test, p-value > 0.05, not significant).

159 Taken together, these data demonstrate that treatment with sulfadiazine impacts not only asexual  
160 blood stage parasites, but also gametocytes and early mosquito stage parasites. This indicates that not  
161 only does the exposure of gametocytes to sulfadiazine affect transmission, but that exposure of the  
162 early mosquito stages to sulfadiazine within the mosquito midgut has a transmission blocking effect as  
163 well. Moreover, it is feasible that sulfadiazine can be introduced to the mosquito midgut via the rodent  
164 host or directly by the mosquito vector. Finally, consistent with sulfa drugs being competitive inhibitors  
165 of *Plasmodium* DHPS, we also conclude that the effects of sulfadiazine treatment upon *Plasmodium*  
166 development in early mosquito stage is reversible and can be at least partially overcome by competition  
167 by pABA supplementation of mosquitoes.

168

## 169 **Discussion**

170 Sulfadiazine treatment is routinely used in rodent-infectious *Plasmodium* research labs to select for  
171 sexual blood stage gametocytes, the only life stage transmissible from host to vector. The enrichment of  
172 this stage away from other blood stage parasites is therefore critical to be able to robustly study the  
173 biology of host-to-vector transmission (epigenetic studies, transcriptomic studies, etc.). In particular, the  
174 development of novel transmission blocking strategies to prevent the further spread of malaria is  
175 dependent on a deep understanding of sexual stage biology. However, the underappreciated effect of  
176 gametocyte enrichment by sulfadiazine could be impacting these studies of parasite transmission.



177

178 Here we have shown that parasite transmission is impaired by sulfadiazine exposure of parasites in both  
179 the host and in the mosquito vector. The timing of exposure to sulfadiazine treatment is important and  
180 impactful, as mosquitoes that fed on sulfadiazine-treated mice likely have taken up sulfadiazine with  
181 their bloodmeal. In this scenario, if sulfadiazine was present in the blood bolus, it is feasible that early  
182 mosquito stage zygotes and ookinetes were exposed to the drug as well. Because sulfonamides are  
183 pABA analogs, we tested if treatment of mosquitoes with fresh pABA water could overcome sulfadiazine  
184 exposure. Ultimately, pABA supplementation of sulfadiazine-treated parasites resulted in only a partial  
185 restoration of transmission capability, as there were still significantly lower numbers of mosquitoes  
186 infected and lower numbers of oocysts per infected mosquito with sulfadiazine treated parasites, even  
187 upon fresh pABA supplementation. *In vitro*, sulfadiazine-exposed gametocytes can still develop into  
188 morphologically mature ookinetes. The blood used for *in vitro* culturing of ookinetes was enriched using  
189 an Accudenz gradient to collect infected red blood cells, so effectively any sulfadiazine in the whole  
190 blood collected from the mice was washed out. The excess pABA present in the ookinete culture media  
191 can then outcompete for binding to DHPS and allow the parasites to develop as expected.

192

193 It is possible that sulfadiazine treatment of the mouse or of mosquitoes before transmission may affect  
194 the mosquito midgut microbiome as well as the *Plasmodium* parasites. We did not observe adverse  
195 effects on mosquito survival with sulfadiazine supplementation. Though we have not directly studied  
196 the effects of sulfadiazine treatment on the mosquito midgut microbiome here, when placed in the  
197 context of previous studies, it is most plausible that the sulfadiazine-induced transmission defect we  
198 observed is parasite specific. Several studies that have explored these effects are worth noting. First, it  
199 was demonstrated that the mosquito midgut bacteria can have a negative effect on *Plasmodium*  
200 development in the mosquito, and that antibiotic treatment leads to higher parasite infection [21].

201 Additionally, it was shown that mosquitoes that fed on *Plasmodium*-infected blood containing penicillin  
202 and streptomycin had enhanced mosquito stage infections and reduced bacterial growth [22]. This  
203 antibiotic treatment could perhaps give the parasites a competitive advantage over the bacterial flora  
204 for nutrients in the mosquito midgut. If sulfadiazine treatment was adversely affecting the mosquito  
205 microbiome, we could similarly anticipate that the parasites would have enhanced development in the  
206 mosquitoes, rather than a defect such as what we have observed.

207

208 Recent work exposing mosquitoes to antimalarials, rather than antibiotics, may prove to be a new way  
209 to prevent new infections in natural transmission settings. For example, *Anopheles gambiae* exposed to  
210 atovaquone before an infectious bloodmeal results in a mosquito stage infection deficiency [23]. Testing  
211 more antimalarial drugs in this fashion could improve transmission blocking strategies for the  
212 elimination of malaria. This is another example of antimalarials taking on a new life after blood stage  
213 parasite resistance has emerged.

214

215 Finally, there are other means to enrich for gametocytes that may be preferable and less disruptive to  
216 transmission, like flow cytometry using gametocyte-specific antibodies or available fluorescent reporter  
217 lines using male- or female-enriched promoters [24-25], or magnetic enrichment [26-27]. Based upon  
218 these results, we strongly encourage their use over sulfadiazine selection to produce as minimally  
219 perturbed parasites as possible for the study of host-to-vector transmission.

220

221

222 **Materials and Methods**

223 [Ethics Statement](#)

224 All vertebrate animal care followed the Association for Assessment and Accreditation of Laboratory  
225 Animal Care (AAALAC) guidelines and was approved by the Pennsylvania State University Institutional  
226 Animal Care and Use Committee (IACUC# PRAMS201342678). All procedures involving vertebrate  
227 animals were conducted in strict accordance with the recommendations in the Guide for Care and Use  
228 of Laboratory Animals of the National Institutes of Health with approved Office for Laboratory Animal  
229 Welfare (OLAW) assurance.

230

#### 231 Use and Maintenance of Experimental Animals

232 Six-to-eight-week-old female Swiss Webster (SW) mice were used for all experiments in this work.  
233 *Anopheles stephensi* mosquitoes were reared and maintained at 24°C and 70% humidity under 12-hour  
234 light/dark cycles and were fed 0.05% w/v pABA-supplemented 10% (Sigma Aldrich, Cat#100536-250G)  
235 w/v sugar water. Mice were infected intraperitoneally with PyWT-GFP transgenic parasites that  
236 constitutively express GFP under a constitutive EF1 alpha promoter from the *pyp230p* dispensable locus  
237 (described previously,[28]).

238

#### 239 Treatment of Mice and Mosquitoes with Sulfadiazine

240 Mice were provided with standard drinking water before infection. After infection with PyWT-GFP  
241 parasites, the mice were kept on standard drinking water or were provided water supplemented with 10  
242 mg/L sulfadiazine (VWR, Cat# AAA12370-30) for two days before the infectious blood meal to select for  
243 gametocytes. Mosquitoes were provided normal pABA/sugar water (0.05% w/v pABA, 10% w/v sugar)  
244 during rearing, and kept on normal pABA/sugar water, or supplied with pABA/sugar water  
245 supplemented with 10 mg/L sulfadiazine for two days before the infectious blood meal. After the blood  
246 meal, mosquitoes were again provided standard sugar/pABA drinking water for the duration of the  
247 *Plasmodium* infection.

248

249 Host-to-Vector Transmission of *Plasmodium yoelii*

250 Mice infected with PyWT-GFP parasites were screened daily for parasitemia by Giemsa-stained thin  
251 blood smears and for the presence of male gametogenesis (visible as discrete exflagellation centers) via  
252 wet mount of a drop of blood incubated at room temperature for 8-10 minutes, as described previously  
253 [29]. On the peak day of exflagellation, the infected mice were anesthetized with a ketamine/xylazine  
254 cocktail and the mosquitoes were allowed to feed on the mice once for 15 minutes. Mosquito midguts  
255 were dissected seven days post-blood meal, and the prevalence and intensity of infection were assessed  
256 by differential interference contrast (DIC) and live fluorescence microscopy (Zeiss AxioScope A1 with 8-  
257 bit AxioCam ICc1 camera) using a 100X oil objective and processed by Zen 2012 (blue edition) imaging  
258 software.

259

260 Production of *In Vitro* Ookinetes

261 Mice infected with PyWT-GFP parasites were supplied with standard drinking water or were treated  
262 with 10 mg/L sulfadiazine-treated drinking water to select for gametocytes for two days leading up to  
263 exsanguination. Parasitemia was assessed by Giemsa-stained thin blood smears and centers-of-  
264 movement were assessed to establish optimal experimental timing as described above. Blood was  
265 collected by cardiac puncture and then was maintained at 37°C in incomplete RPMI with 25mM HEPES  
266 and L-Glutamine (VWR Cat# 45000-412). Infected red blood cells were enriched by an Accudenz  
267 discontinuous gradient as previously described [30]. Ookinete cultures were generated as previously  
268 described, with modifications for *P. yoelii* [31-32]. Briefly, the Accudenz collected cells were added to *in*  
269 *vitro* ookinete media (RPMI 1640, 20% v/v FBS (Fisher Scientific, Cat#MT35011CV), 0.05% w/v  
270 hypoxanthine (Fisher Scientific, Cat#AC122010250), 100 µM xanthurenic acid (Sigma Aldrich, Cat#  
271 D120804-1G), pH 8.2 at 22°C) and were allowed to develop for 24 hours at room temperature. The pH

272 was adjusted to pH 8.2 using KOH, rather than pH 7.5 for *P. berghei*, and cultures were maintained for  
273 24 hours at ambient temperature (22°C), rather than a 19°C incubator. Retorts and ookinetes were then  
274 observed and quantified by DIC and fluorescence microscopy (Zeiss Axioscope A1 with 8-bit AxioCam  
275 ICc1 camera) using the 100X oil objective and processed by Zen 2012 (blue edition) imaging software.

276

#### 277 Statistical Analyses

278 Statistical differences in midgut oocysts infection numbers and numbers of infected mosquitoes were  
279 analyzed by Mann-Whitney unpaired t-test with  $p < 0.05$  indicating statistical significance. P-values are  
280 listed where significant. The Mann-Whitney t-test was used because the data does not follow a normal  
281 distribution and control and experimental groups are independent of each other. A two proportion Z-  
282 score test was used for statistical analyses of ookinete and retort formation *in vitro* under no treatment  
283 conditions or with sulfadiazine treatment;  $p$ -value  $< 0.05$  indicates significance. All statistical analyses  
284 were performed using Graphpad Prism (v8).

285

#### 286 Data Availability Statement

287 All data related to this study is provided in the manuscript and accompanying supplemental files.

288

#### 289 **Acknowledgements**

290 We thank Katarzyna Modrzynska (U. Glasgow) for helpful discussions related to the optimization of *in*  
291 *vitro* ookinete cultures for *P. yoelii*. We thank Mikaela Follmer for her work maintaining and rearing the  
292 Lindner laboratory mosquito colony. Finally, we thank members of the Lindner and Llinás laboratories  
293 for critical discussions of this work.

294

#### 295 Funding

296 This work was supported by an R01 from the National Institutes of Allergy and Infectious Diseases  
297 (R01AI123341 to SEL), and by funding in support of KTR by the Pennsylvania State University (Bunton-  
298 Waller Fellowship, COVID Relief Funds).

299

### 300 Conflict of Interest

301 The authors declare that they have no conflict of interest.

### 302 References

- 303 [1] E. H. Eklund and D. A. Fidock, "In vitro evaluations of antimalarial drugs and their relevance to  
304 clinical outcomes.," *International journal for parasitology*, vol. 38, no. 7, pp. 743–7, Jun. 2008,  
305 doi: 10.1016/j.ijpara.2008.03.004.
- 306 [2] T. Triglia, J. G. Menting, C. Wilson, and A. F. Cowman, "Mutations in dihydropteroate synthase  
307 are responsible for sulfone and sulfonamide resistance in *Plasmodium falciparum*.,," *Proceedings*  
308 *of the National Academy of Sciences of the United States of America*, vol. 94, no. 25, pp. 13944–9,  
309 Dec. 1997, doi: 10.1073/pnas.94.25.13944.
- 310 [3] P. Wang, M. Read, P. F. Sims, and J. E. Hyde, "Sulfadoxine resistance in the human malaria  
311 parasite *Plasmodium falciparum* is determined by mutations in dihydropteroate synthetase and  
312 an additional factor associated with folate utilization.,," *Molecular microbiology*, vol. 23, no. 5, pp.  
313 979–86, Mar. 1997, doi: 10.1046/j.1365-2958.1997.2821646.x.
- 314 [4] P. Wang *et al.*, "Resistance to antifolates in *Plasmodium falciparum* monitored by sequence  
315 analysis of dihydropteroate synthetase and dihydrofolate reductase alleles in a large number of  
316 field samples of diverse origins.,," *Molecular and biochemical parasitology*, vol. 89, no. 2, pp. 161–  
317 77, Nov. 1997, doi: 10.1016/s0166-6851(97)00114-x.
- 318 [5] World Health Organization., "World Malaria Report 2020.,," *Available from:*  
319 <https://www.who.int/publications/i/item/9789240015791>.
- 320 [6] A. L. Beetsma, T. J. van de Wiel, R. W. Sauerwein, and W. M. Eling, "*Plasmodium berghei* ANKA:  
321 purification of large numbers of infectious gametocytes.,," *Experimental parasitology*, vol. 88, no.  
322 1, pp. 69–72, Jan. 1998, doi: 10.1006/expr.1998.4203.
- 323 [7] T. Triglia and A. F. Cowman, "The mechanism of resistance to sulfa drugs in *Plasmodium*  
324 *falciparum*.,," *Drug resistance updates : reviews and commentaries in antimicrobial and*  
325 *anticancer chemotherapy*, vol. 2, no. 1, pp. 15–19, Feb. 1999, doi: 10.1054/drup.1998.0060.

- 326 [8] I. B. Müller and J. E. Hyde, "Folate metabolism in human malaria parasites--75 years on.,"  
327 *Molecular and biochemical parasitology*, vol. 188, no. 1, pp. 63–77, Mar. 2013, doi:  
328 10.1016/j.molbiopara.2013.02.008.
- 329 [9] J. M. Matz, M. Watanabe, M. Falade, T. Tohge, R. Hoefgen, and K. Matuschewski, "Plasmodium  
330 Para-Aminobenzoate Synthesis and Salvage Resolve Avoidance of Folate Competition and  
331 Adaptation to Host Diet.," *Cell reports*, vol. 26, no. 2, pp. 356-363.e4, 2019, doi:  
332 10.1016/j.celrep.2018.12.062.
- 333 [10] B. G. MAEGRAITH, T. DEEGAN, and E. S. JONES, "Suppression of malaria (*P. berghei*) by milk.,"  
334 *British medical journal*, vol. 2, no. 4799, pp. 1382–4, Dec. 1952, doi: 10.1136/bmj.2.4799.1382.
- 335 [11] G. A. Kicska, L.-M. Ting, V. L. Schramm, and K. Kim, "Effect of dietary p-aminobenzoic acid on  
336 murine *Plasmodium yoelii* infection.," *The Journal of infectious diseases*, vol. 188, no. 11, pp.  
337 1776–81, Dec. 2003, doi: 10.1086/379373.
- 338 [12] M. Parra, J. Yang, M. Weitner, and M. Akkoyunlu, "Neonatal mice resist *Plasmodium yoelii*  
339 infection until exposed to para-aminobenzoic acid containing diet after weaning.," *Scientific*  
340 *reports*, vol. 11, no. 1, p. 90, 2021, doi: 10.1038/s41598-020-79703-2.
- 341 [13] W. Peters and A. E. Ramkaran, "The chemotherapy of rodent malaria, XXXII. The influence of p-  
342 aminobenzoic acid on the transmission of *Plasmodium yoelii* and *P. berghei* by *Anopheles*  
343 *stephensi*," *Annals of tropical medicine and parasitology*, vol. 74, no. 3, pp. 275–82, Jun. 1980.
- 344 [14] Denise L. Doolan, Ed., *Malaria Methods and Protocols*. Springer Science & Business Media, 2002.
- 345 [15] A. S. I. Aly, A. M. Vaughan, and S. H. I. Kappe, "Malaria parasite development in the mosquito and  
346 infection of the mammalian host.," *Annual review of microbiology*, vol. 63, pp. 195–221, 2009,  
347 doi: 10.1146/annurev.micro.091208.073403.
- 348 [16] L. A. TERZIAN, "A method for screening antimalarial drugs in the mosquito host.," *The Journal of*  
349 *parasitology*, vol. 33, no. 2, p. 15, Dec. 1947.
- 350 [17] E. J. Gerberg, "Evaluation of antimalarial compounds in mosquito test systems.," *Transactions of*  
351 *the Royal Society of Tropical Medicine and Hygiene*, vol. 65, no. 3, pp. 358–63, 1971, doi:  
352 10.1016/0035-9203(71)90014-9.
- 353 [18] L. A. TERZIAN, "The sulfonamides as factors in increasing susceptibility to parasitic invasion.," *The*  
354 *Journal of infectious diseases*, vol. 87, no. 3, pp. 285–90, doi: 10.1093/infdis/87.3.285.
- 355 [19] L. A. TERZIAN, N. STAHLER, and P. A. WARD, "The effect of antibiotics and metabolites on the  
356 immunity of mosquitoes to malarial infection.," *The Journal of infectious diseases*, vol. 90, no. 2,  
357 pp. 116–30, doi: 10.1093/infdis/90.2.116.
- 358 [20] L. A. Terzian, N. Stahler, and A. T. Dawkins, "The sporogonous of *Plasmodium vivax* in *Anopheles*  
359 mosquitoes as a system for evaluating the prophylactic and curative capabilities of potential  
360 antimalarial compounds.," *Experimental parasitology*, vol. 23, no. 1, pp. 56–66, Aug. 1968, doi:  
361 10.1016/0014-4894(68)90042-8.

- 362 [21] R. C. Smith, J. Vega-Rodríguez, and M. Jacobs-Lorena, "The Plasmodium bottleneck: malaria  
363 parasite losses in the mosquito vector.," *Memorias do Instituto Oswaldo Cruz*, vol. 109, no. 5, pp.  
364 644–61, Aug. 2014.
- 365 [22] M. Gendrin *et al.*, "Antibiotics in ingested human blood affect the mosquito microbiota and  
366 capacity to transmit malaria.," *Nature communications*, vol. 6, p. 5921, Jan. 2015, doi:  
367 10.1038/ncomms6921.
- 368 [23] D. G. Paton, L. M. Childs, M. A. Itoe, I. E. Holmdahl, C. O. Buckee, and F. Catteruccia, "Exposing  
369 Anopheles mosquitoes to antimalarials blocks Plasmodium parasite transmission.," *Nature*, vol.  
370 567, no. 7747, pp. 239–243, 2019, doi: 10.1038/s41586-019-0973-1.
- 371 [24] M. Ponzi *et al.*, "Egress of Plasmodium berghei gametes from their host erythrocyte is mediated  
372 by the MDV-1/PEG3 protein.," *Cellular microbiology*, vol. 11, no. 8, pp. 1272–88, Aug. 2009, doi:  
373 10.1111/j.1462-5822.2009.01331.x.
- 374 [25] L. M. Bowman, L. E. Finger, K. J. Hart, and S. E. Lindner, "Definition of constitutive and stage-  
375 enriched promoters in the rodent malaria parasite, Plasmodium yoelii.," *Malaria journal*, vol. 19,  
376 no. 1, p. 424, Nov. 2020, doi: 10.1186/s12936-020-03498-w.
- 377 [26] Q. L. Fivelman *et al.*, "Improved synchronous production of Plasmodium falciparum gametocytes  
378 in vitro.," *Molecular and biochemical parasitology*, vol. 154, no. 1, pp. 119–23, Jul. 2007, doi:  
379 10.1016/j.molbiopara.2007.04.008.
- 380 [27] C. Ribaut *et al.*, "Concentration and purification by magnetic separation of the erythrocytic stages  
381 of all human Plasmodium species.," *Malaria journal*, vol. 7, p. 45, Mar. 2008, doi: 10.1186/1475-  
382 2875-7-45.
- 383 [28] E. E. Muñoz, K. J. Hart, M. P. Walker, M. F. Kennedy, M. M. Shipley, and S. E. Lindner, "ALBA4  
384 modulates its stage-specific interactions and specific mRNA fates during Plasmodium yoelii  
385 growth and transmission.," *Molecular microbiology*, vol. 106, no. 2, pp. 266–284, Oct. 2017, doi:  
386 10.1111/mmi.13762.
- 387 [29] K. J. Hart *et al.*, "Plasmodium male gametocyte development and transmission are critically  
388 regulated by the two putative deadenylases of the CAF1/CCR4/NOT complex.," *PLoS pathogens*,  
389 vol. 15, no. 1, p. e1007164, 2019, doi: 10.1371/journal.ppat.1007164.
- 390 [30] *Methods in Malaria Research*, 6th ed. 2013.
- 391 [31] K. Modrzynska *et al.*, "A Knockout Screen of ApiAP2 Genes Reveals Networks of Interacting  
392 Transcriptional Regulators Controlling the Plasmodium Life Cycle.," *Cell host & microbe*, vol. 21,  
393 no. 1, pp. 11–22, Jan. 2017, doi: 10.1016/j.chom.2016.12.003.
- 394 [32] C. J. Janse, B. Mons, R. J. Rouwenhorst, P. F. van der Klooster, J. P. Overdulve, and H. J. van der  
395 Kaay, "In vitro formation of ookinetes and functional maturity of Plasmodium berghei  
396 gametocytes.," *Parasitology*, vol. 91 ( Pt 1), pp. 19–29, Aug. 1985, doi:  
397 10.1017/s0031182000056481.



399 **Figure Legends**

400 **Figure 1. Sulfadiazine exposure in the host limits transmission to the mosquito vector.** A. Mice infected  
401 with PyWT-GFP parasites were given standard drinking water (control) or water supplemented with 10  
402 mg/L sulfadiazine (treated) for two days before mosquitoes were allowed to take an infectious blood  
403 meal. On day 7 post-blood meal, the percentage of mosquitoes infected (prevalence) (B) and the  
404 number of oocysts per infected mosquito (intensity of infection) (C) were assessed by live fluorescence  
405 microscopy. B. The average prevalence of infection for each biological replicate is represented by a data  
406 point, and the mean percentage of infected mosquitoes of all replicates is provided as a horizontal line.  
407 The grey data points correspond to the fourth replicate in Panel C. Mann-Whitney unpaired t-test was  
408 used for statistical analyses; \* p-value < 0.05. C. The intensity of infection as measured by the number of  
409 counted oocysts per infected mosquito is plotted and the number of infected mosquitoes over the total  
410 number of mosquitoes counted for each sample is listed above each sample. Biological conditions for  
411 the final replicate (gray data points) may have been different, including supplementation of mosquitoes  
412 with fresher pABA (tested in Figure 2). Mann-Whitney unpaired t-test was used for statistical analyses;  
413 \*\*\*\* p-value < 0.0001.

414

415 **Figure 2. Fresh pABA supplementation can partially recover sulfadiazine exposure of parasites in the**  
416 **host.** A. Mice infected with PyWT-GFP parasites were given standard drinking water (control), or water  
417 supplemented with 10 mg/L sulfadiazine (treated), two days before mosquitoes were allowed to take an  
418 infectious blood meal. Mosquito sugar water was supplemented daily with freshly diluted pABA (0.05%  
419 w/v) to test if fresh pABA can compete with sulfadiazine in the blood meal to recover parasite infection  
420 in the mosquito. On day seven post-blood meal, the percent of infected mosquitoes (prevalence) (B) and  
421 the number of oocysts per infected mosquito (intensity of infection) (C) were assessed by live  
422 fluorescence microscopy. B. The average prevalence of infection for each biological replicate is

423 represented by a data point, and the mean percentage of infected mosquitoes of all replicates is  
424 provided as a horizontal line. Mann-Whitney unpaired t-test was used for statistical analyses; \* p-value =  
425 0.01. C. The intensity of infection, as measured by the number of counted oocysts per infected mosquito  
426 is plotted. The number of infected mosquitoes out of the total number of mosquitoes counted for each  
427 sample is listed above each sample. Mann-Whitney unpaired t-test was used for statistical analyses;  
428 \*\*\*\* p-value < 0.0001.

429

430 **Figure 3. Sulfadiazine exposure to early mosquito stages decreases oocyst intensity.** A. Mosquitoes  
431 were given standard sugar/pABA water, or sugar/pABA water supplemented with 10 mg/L sulfadiazine  
432 for two days leading up to an infectious blood meal from PyWT-GFP-infected mice, such that early  
433 mosquito stages are then exposed to sulfadiazine as they are taken up by the mosquito. On day 7 post-  
434 blood meal, the percentage of mosquitoes infected (prevalence) (B) and the number of oocysts per  
435 infected mosquito (intensity of infection) (C) were assessed by live fluorescence microscopy. B. The  
436 percentage of mosquitoes infected that fed on PyWT-GFP mice when mosquitoes were exposed to  
437 sulfadiazine (treated), or not (control) daily leading up to the infectious bloodmeal is plotted. The  
438 average percent infection for each biological replicate are represented by each data point, and the mean  
439 prevalence of all replicates is provided as a horizontal line. Mann-Whitney unpaired t-test was used for  
440 statistical analyses; ns = no significant difference, p-value > 0.05. C. The intensity of infection, as  
441 measured by the number of counted oocysts per infected mosquito is plotted. The number of infected  
442 mosquitoes out of the total number of mosquitoes counted for each sample is listed above each sample.  
443 Mann-Whitney unpaired t-test was used for statistical analyses; \* p-value < 0.05; \*\*\*\* p-value < 0.0001.

444

445 **Figure 4. Sulfadiazine exposure to parasites in the host does not affect their ability to morphologically**  
446 **mature *in vitro*.** A. Mice infected with PyWT-GFP parasites were given standard drinking water (control)  
447 or drinking water supplemented with 10 mg/L sulfadiazine (treated) for two days before parasite  
448 collection by exsanguination. Collected parasites were enriched by a discontinuous Accudenz gradient  
449 before being resuspended in sulfadiazine-free ookinete culture medium at room temperature. After 24  
450 hours, the proportion of immature retorts and mature ookinetes was assessed by morphology. B.  
451 Representative images of retorts (top) or mature ookinetes (bottom) from control and treated parasites.  
452 C. The proportion of immature retorts and mature ookinetes observed in culture from blood of mice  
453 that was supplemented with sulfadiazine (treated) or not (control). A two proportion Z-score test was  
454 used for statistical analysis; ns = no significant difference, p-value > 0.05.

455

456 **Supplemental Figure Legend:**

457 **Supplemental Figure 1. Representative images of midguts seven days after bloodmeal under control**  
458 **conditions, or with sulfadiazine supplementation of the rodent host or mosquito vector.** Midgut  
459 infection with PyWT-GFP oocysts was assessed by live fluorescence microscopy seven days after the  
460 infectious bloodmeal. Scale bars are 100  $\mu\text{m}$ .

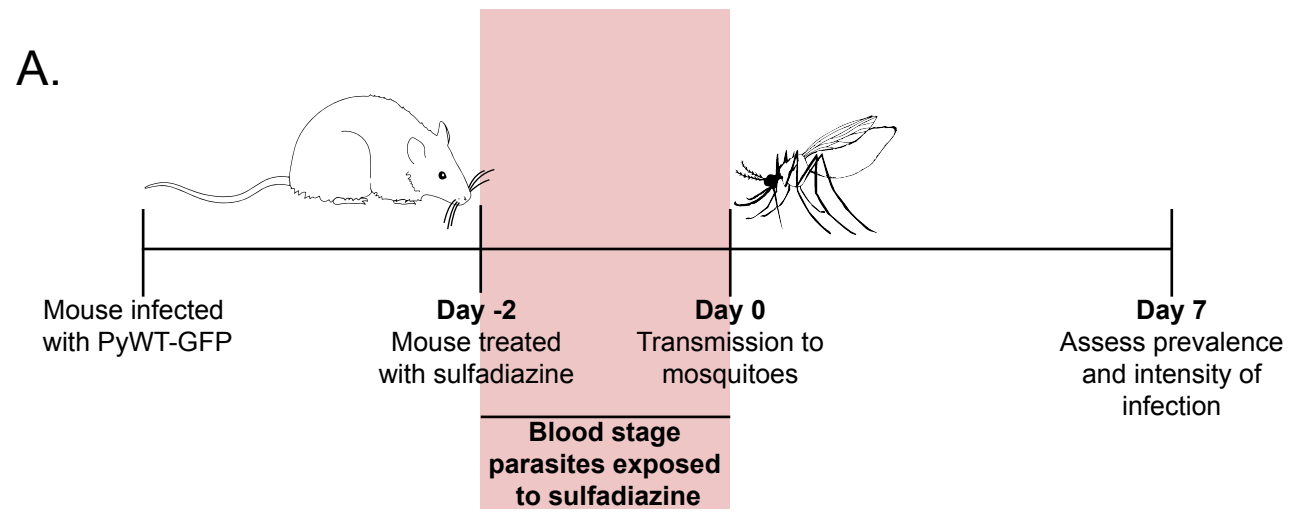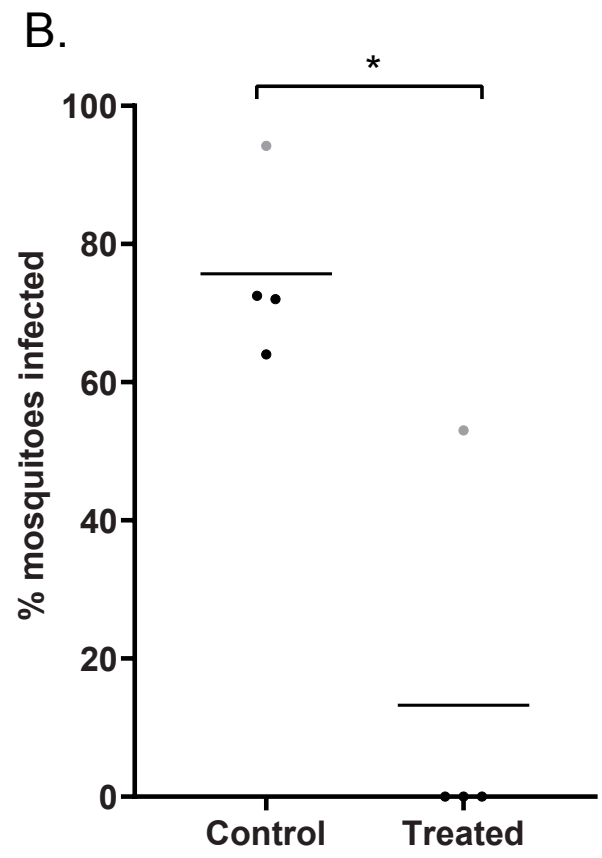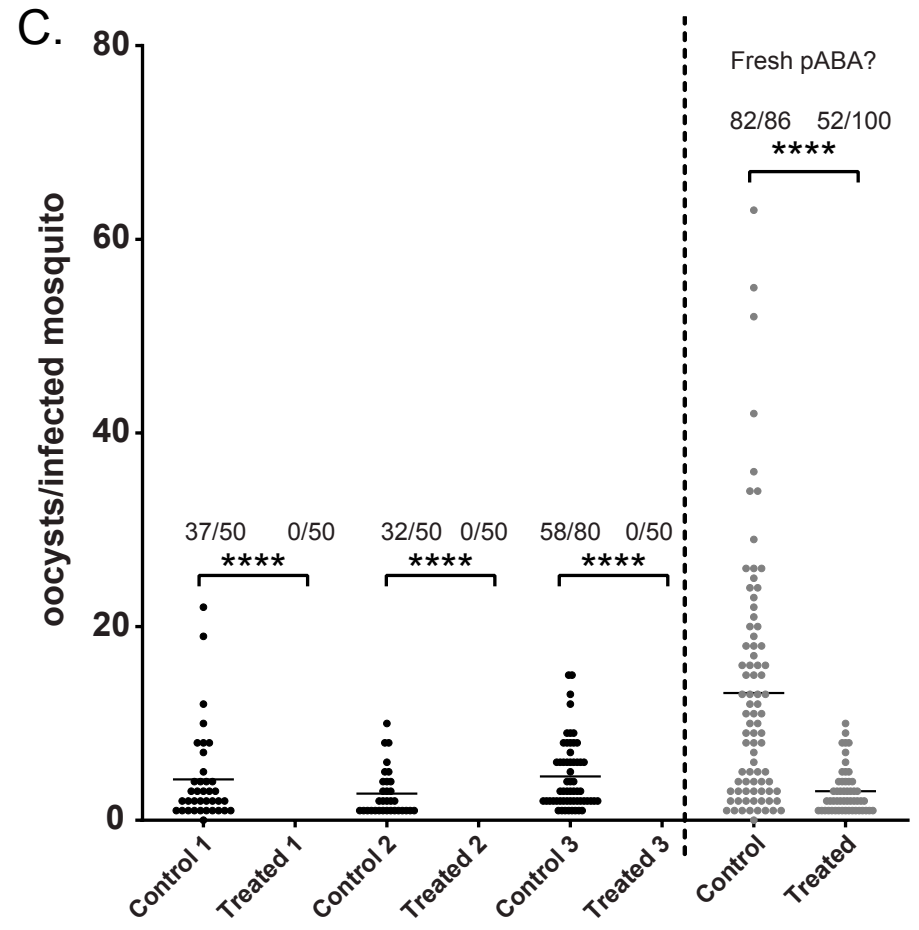

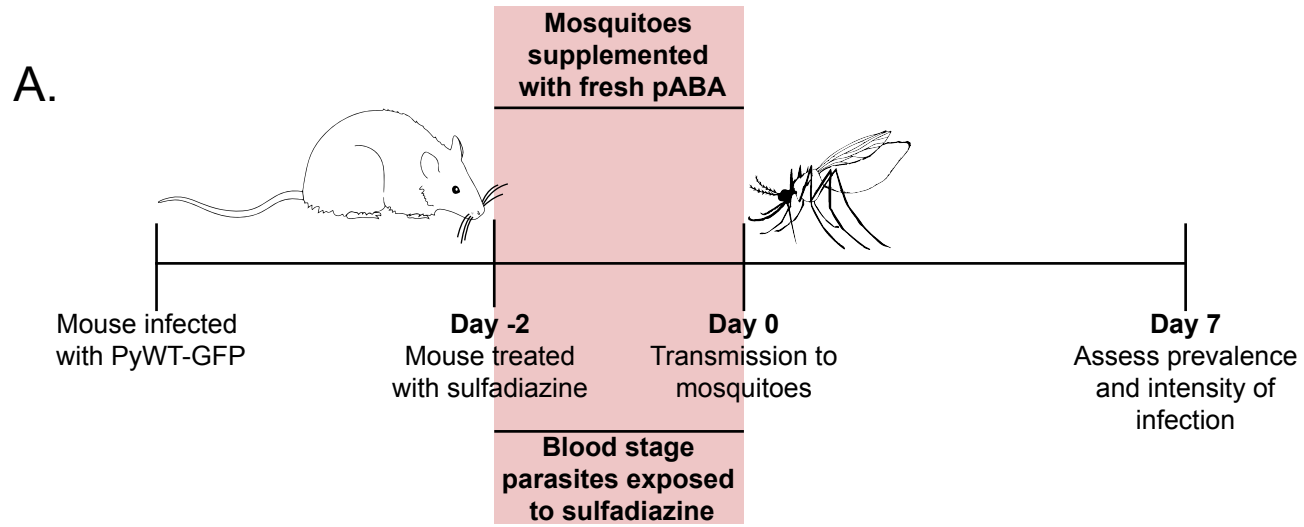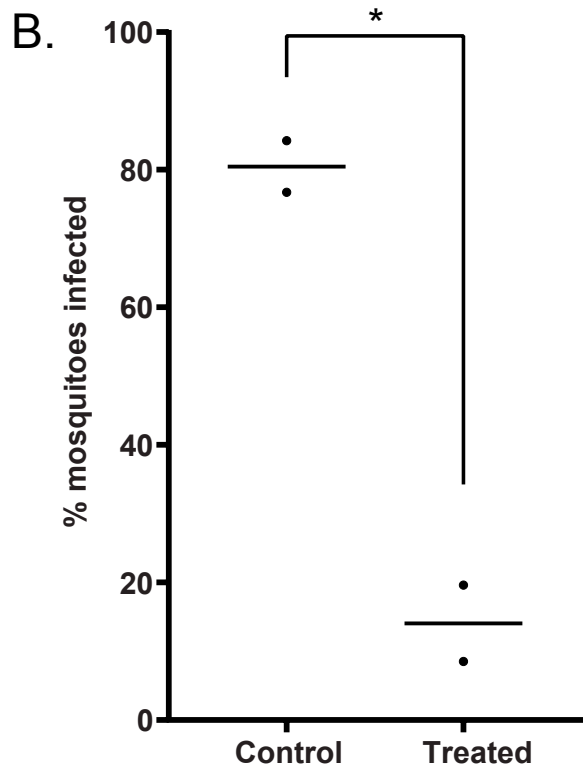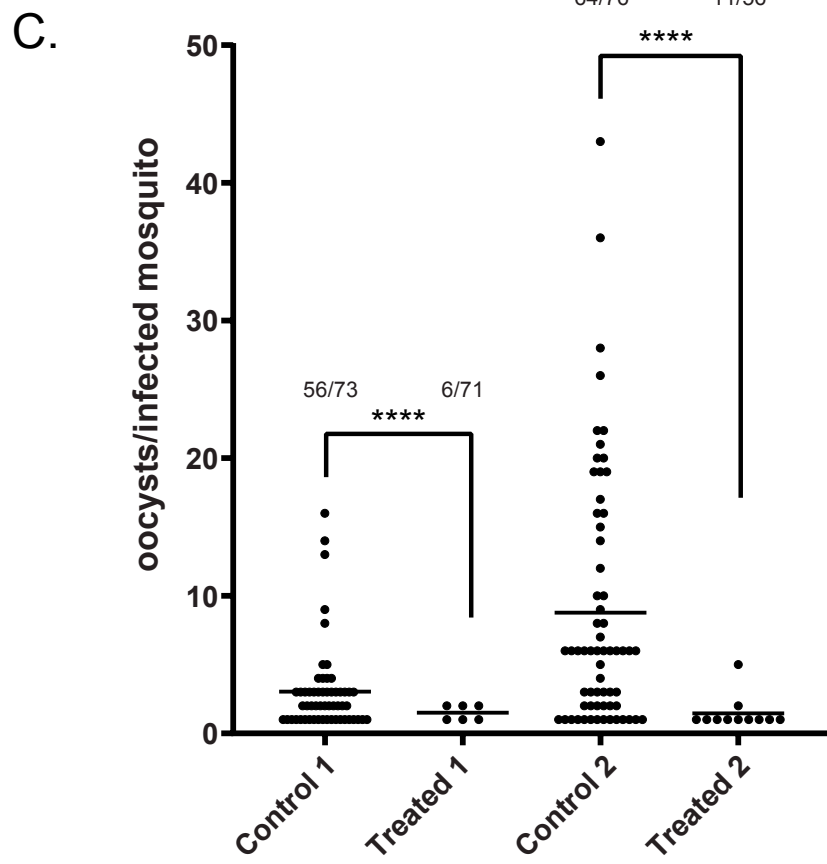

A.

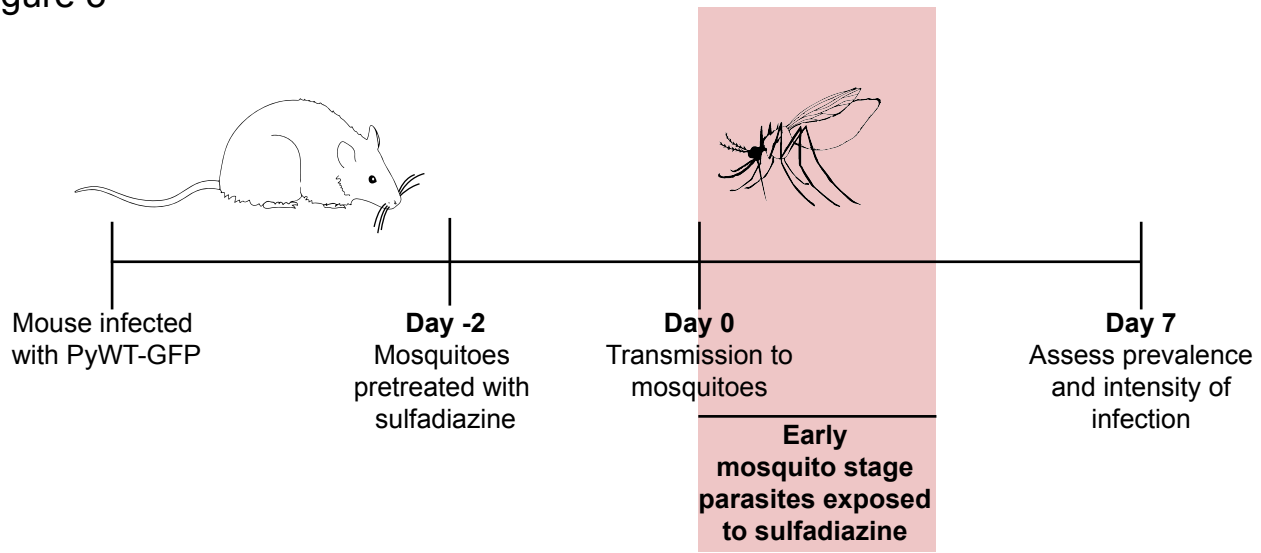

B.

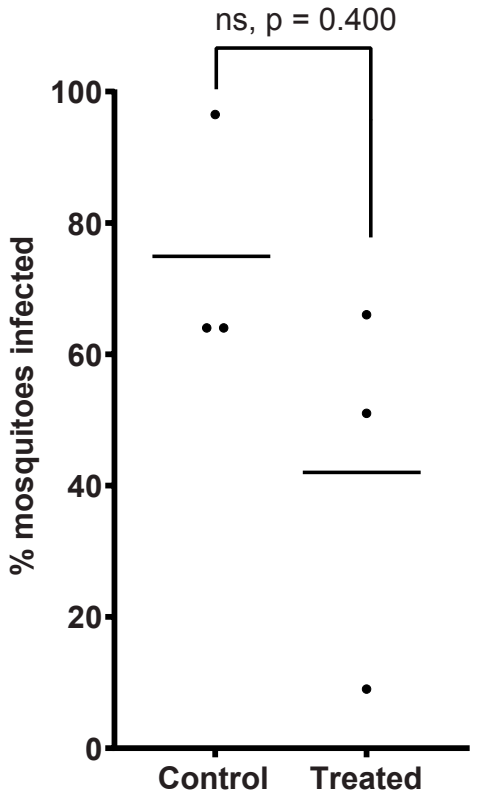

C.

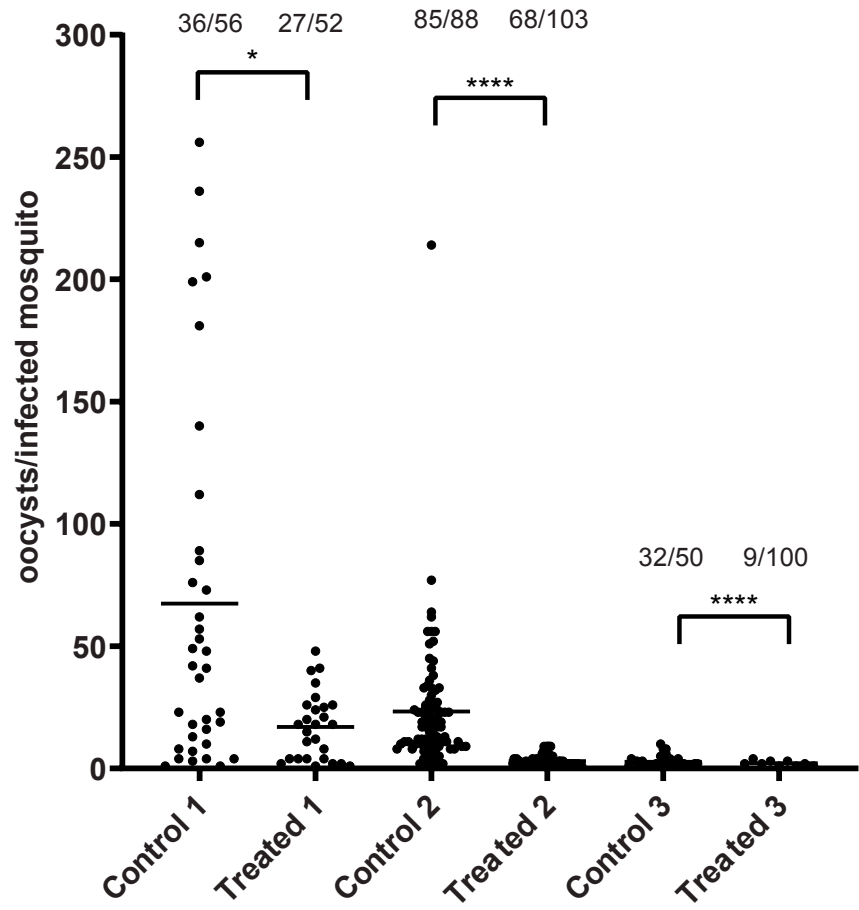

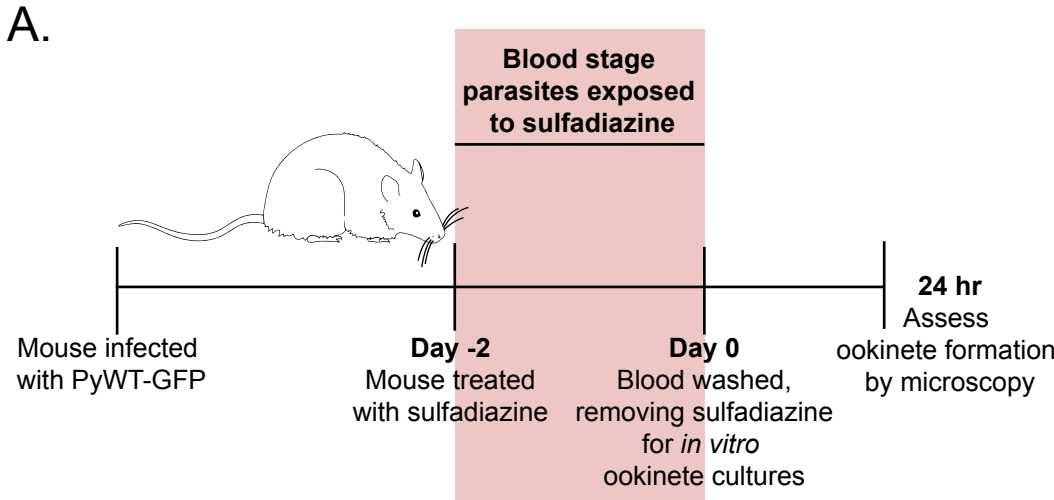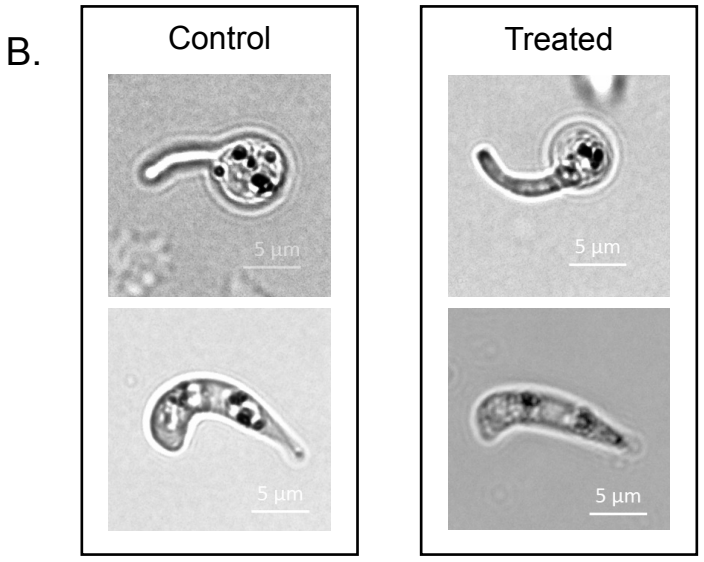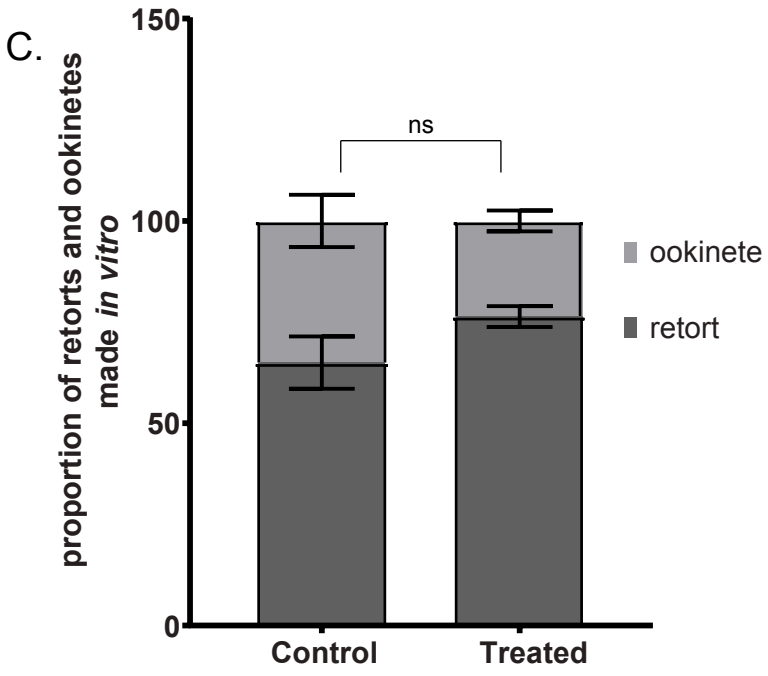

bioRxiv preprint doi: <https://doi.org/10.1101/2022.01.13.476179>; this version posted January 13, 2022. The copyright holder for this preprint (which was not certified by peer review) is the author/funder, who has granted bioRxiv a license to display the preprint in perpetuity. It is made available under aCC-BY 4.0 International license.

Brightfield

Live GFP

Merge

PyWT-GFP  
no sulfadiazine

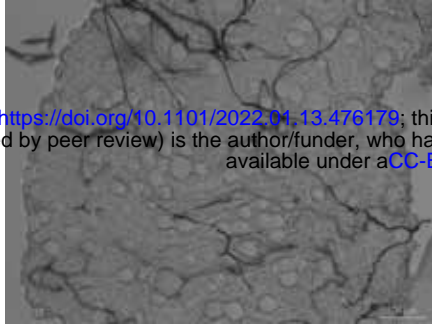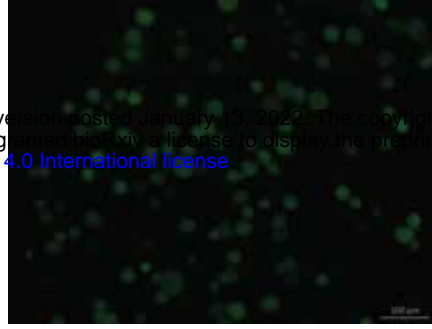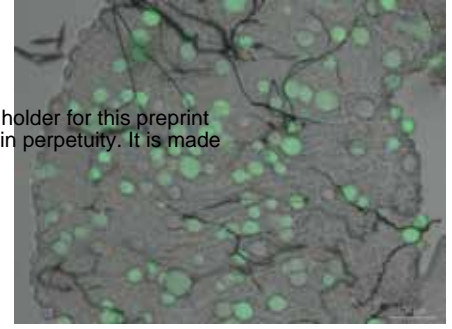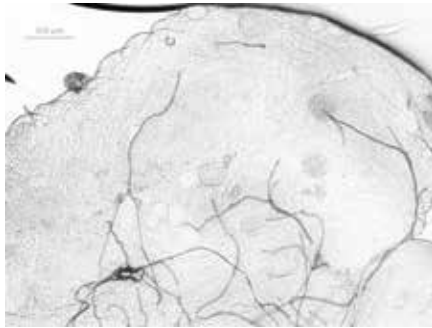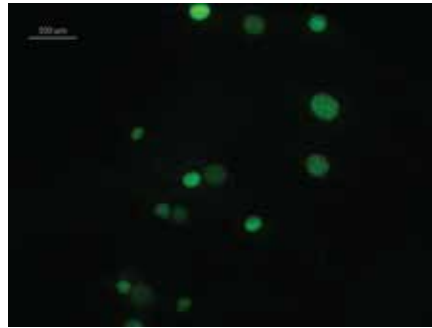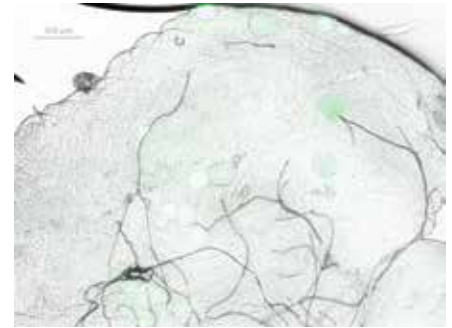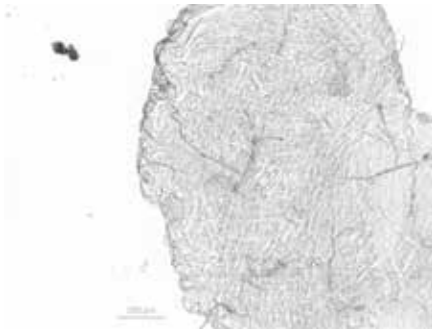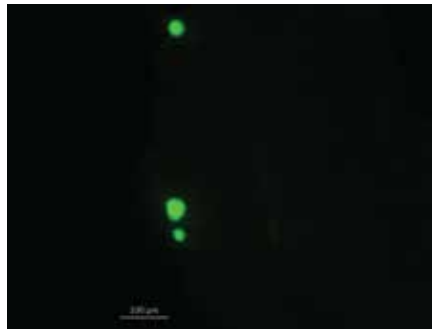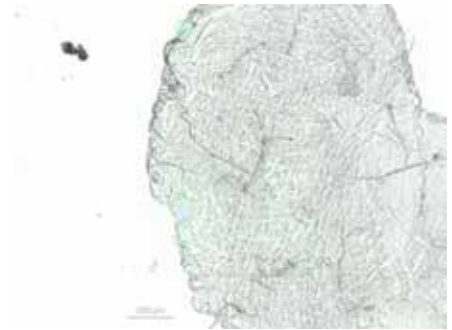

PyWT-GFP  
sulfadiazine-treated  
mouse

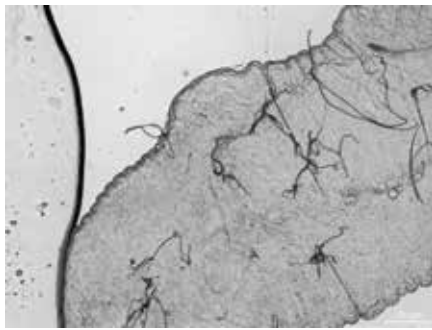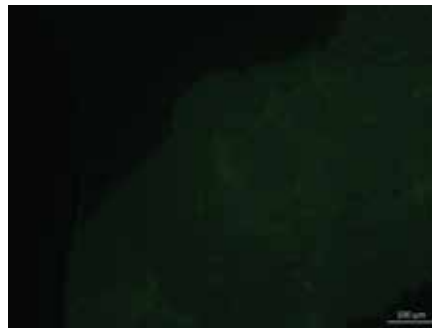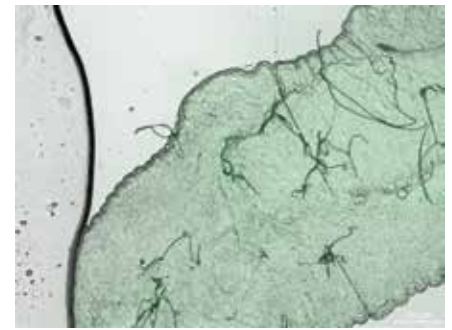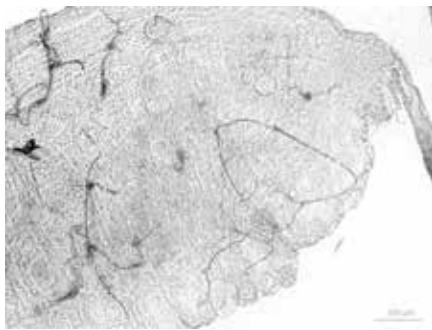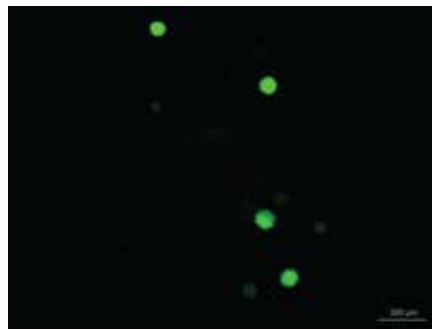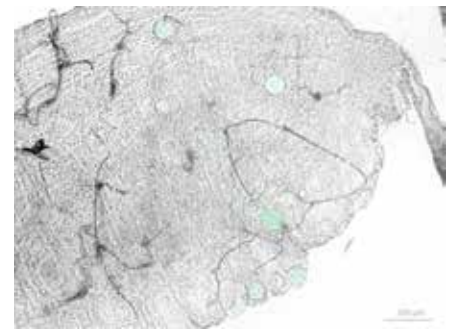

PyWT-GFP  
sulfadiazine-treated  
mosquitoes

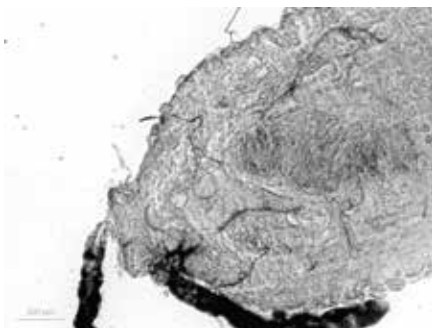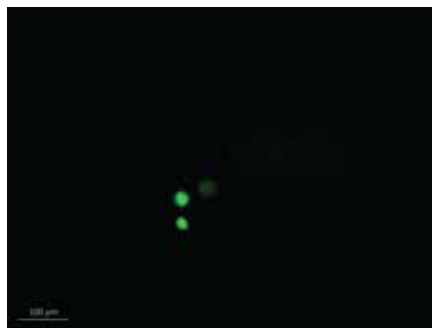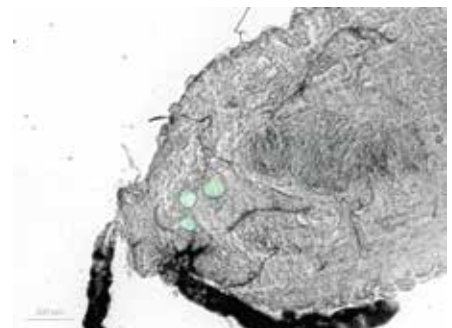

Source: http://biorxiv.org/content/10.1101/2022.01.13.476179v1.full.pdf
